# Supplementary material for: The Leucine-Responsive Regulatory Protein Lrp Participates in Virulence Regulation Downstream of Small RNA ArcZ in Erwinia amylovora
Source: PubMed Central journal article supplement (PMC6538786; doi:10.1128/mbio.00757-19), 2019-05-28

**A**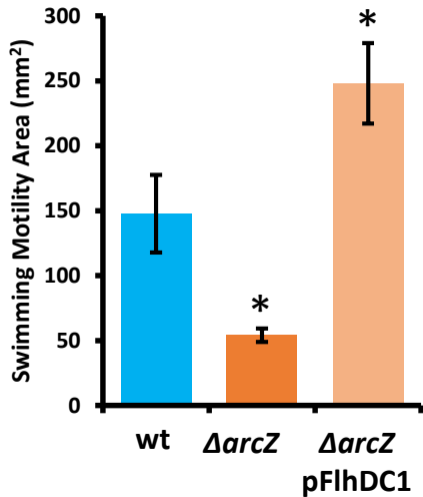**B**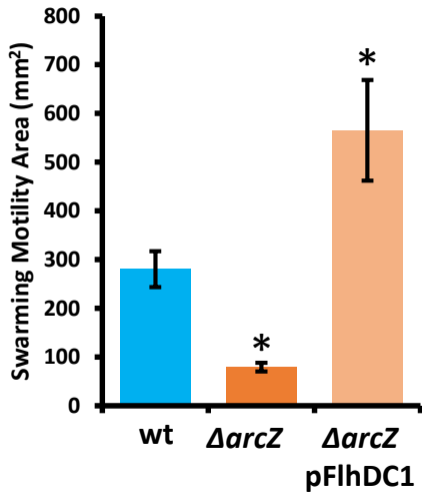

Supplement: mBio.00757-19-sf002.pdf [file mBio.00757-19-sf002.pdf]
