# Supplementary material for: The Leucine-Responsive Regulatory Protein Lrp Participates in Virulence Regulation Downstream of Small RNA ArcZ in Erwinia amylovora
Source: PubMed Central journal article supplement (PMC6538786; doi:10.1128/mbio.00757-19), 2019-05-28
Supplement: mBio.00757-19-st001.pdf [file mBio.00757-19-st001.pdf]

Table S1: Strains and plasmids used in this work

| Strains and Plasmids              | Relevant Characteristics             | Source or Reference                             |
|-----------------------------------|--------------------------------------|-------------------------------------------------|
| Escherichia coli                  |                                      |                                                 |
| DH5 $\alpha$                      |                                      | Invitrogen                                      |
| S17-1                             | Conjugative donor for Tn mutagenesis | (Simon, Priefer, and Pühler, 1983) <sup>1</sup> |
| Erwinia amylovora                 |                                      |                                                 |
| Ea1189                            | wild-type                            | GSPB <sup>a</sup>                               |
| Ea1189 $\Delta$ arcZ              | arcZ deletion mutant                 | (Zeng et al., 2013) <sup>2</sup>                |
| Ea1189 $\Delta$ lrp               | lrp deletion mutant                  | This work                                       |
| Ea1189 $\Delta$ arcZ $\Delta$ lrp | arcZ lrp double deletion mutant      | This work                                       |
| Plasmids                          |                                      |                                                 |
| pSUP102::Tn5-B20                  | Tn5-B20 suicide donor plasmid        | (Simon, Quandt, and Klipp, 1989) <sup>3</sup>   |
| pML-ArcZ                          | arcZ complementation                 | (Zeng et al., 2013) <sup>2</sup>                |
| pBBR1::Lrp                        | lrp complementation                  | This work                                       |
| pXG20-Lrp                         | lrp translational fusion             | This work                                       |
| pPROBE-Lrp                        | lrp promoter fusion                  | This work                                       |
| pML-FlhDC1                        | flhDC1 complementation               | This work                                       |

<sup>a</sup>GSPB, Göttinger Sammlung phytopathogener Bakterien, Göttingen, Germany.

<sup>1</sup>Simon, R. U. P. A. P., Priefer, U., & Pühler, A. (1983). A broad host range mobilization system for in vivo genetic engineering: transposon mutagenesis in gram negative bacteria. *Biotechnology*, 1(9), 784.

<sup>2</sup>Zeng, Q., McNally, R. R., & Sundin, G. W. (2013). Global small RNA chaperone Hfq and regulatory small RNAs are important virulence regulators in *Erwinia amylovora*. *Journal of bacteriology*, 195(8), 1706-1717.

<sup>3</sup>Simon, R., Quandt, J., & Klipp, W. (1989). New derivatives of transposon Tn5 suitable for mobilization of replicons, generation of operon fusions and induction of genes in Gram-negative bacteria. *Gene*, 80(1), 161-169.
