# Supplementary material for: The Leucine-Responsive Regulatory Protein Lrp Participates in Virulence Regulation Downstream of Small RNA ArcZ in Erwinia amylovora
Source: PubMed Central journal article supplement (PMC6538786; doi:10.1128/mbio.00757-19), 2019-05-28
Supplement: mBio.00757-19-st002.pdf [file mBio.00757-19-st002.pdf]

Table S2: Oligonucleotides/primers used in this work

| Identifier                 | Sequence                                                                  | Use/Source                                                              |
|----------------------------|---------------------------------------------------------------------------|-------------------------------------------------------------------------|
| DGEN-1                     | GGCCACGCGTCGACTAGTCAGNNNNNNNNNNACGCC                                      | Arbitrary PCR (Miller-Williams, Loewen, and Oresnik, 2006) <sup>1</sup> |
| DGEN-2                     | GGCCACGCGTCGACTAGTCAG                                                     | (Miller-Williams, Loewen, and Oresnik, 2006) <sup>1</sup>               |
| IS50-1                     | CACGATGAAGAGCAGAAG                                                        | (Miller-Williams, Loewen, and Oresnik, 2006) <sup>1</sup>               |
| IS50-2                     | TAGGAGGTCACATGGAAGTCAGAT                                                  | (Oresnik, Pacarynuk, O'Brien, Yost, and Hynes, 1998) <sup>2</sup>       |
| lacZ Ext                   | AGGTTCCGTTTCAGGACGCTACTTGTG                                               | Arbitrary PCR                                                           |
| lacZ Int                   | CCTCCAGATCCTGGAAAACGGGAA                                                  | Arbitrary PCR                                                           |
| Irp knockout F             | TGTAGTTCAGGGTCTGGCAGGTAAGGGAAGAAATATATGAGAGACAC<br>TAGTGTAGGCTGGAGCTGCTTC | Site-directed deletion of Irp                                           |
| Irp knockout R             | GAATTCACAGGAGTGTAGCGAAAATATCAGGTTTTGCACCTGCCCTGT<br>GCATATGAATATCCTCCTTA  | "                                                                       |
| Irp complementation F      | CCCGACTGGAAGCGGGCAGTGGGTGGCGTCAATCAACTGCC                                 | In-vivo assembly cloning of Irp with native promoter                    |
| Irp complementation R      | GTTGCGTCGCGGTGCATGGGACAAGCCCGACGCTGAACC                                   | "                                                                       |
| pBBR1MCS F                 | CACTGCCCCTTTCCAGTCGGG                                                     | In-vivo assembly amplification of pBBR1MCS-2 backbone                   |
| pBBR1MCS R                 | CCATGCACCGCGACGCAAC                                                       | "                                                                       |
| Linker primer              | ACTGACATGGAGGAGGGA                                                        | (Urban and Vogel, 2007) <sup>3</sup>                                    |
| Irp RACE                   | GTTTTTGTAGCGAGCTGAGCGGTATAACC                                             | Mapping 5' transcriptional start site of Irp                            |
| Irp translational fusion F | GAGATTGACATCCCTATCAGTGATAGAGATACTGAGCACATTATAACGC<br>GACAGGCTCTATGTC      | In-vivo assembly of Irp translational fusion                            |
| Irp translational fusion R | AGTTCTTCTCCTTGCTCATGAATTCGCCAGAACCTTCGACGTTAGAAAT<br>ACGTCCATC            | "                                                                       |
| pXG20 F                    | TGTGCTCAGTATCTCTATCACTGATAGGGATGTCAATCTC                                  | In-vivo assembly amplification of pXG20                                 |
| pXG20 R                    | GGTTCTGGCGAATTCATGAGCAAAGGAGAAGAACT                                       | "                                                                       |
| Irp qPCR F                 | CGCATTATCTGGACGCTTCT                                                      |                                                                         |
| Irp qPCR R                 | TGTACAGCGGCGTTAAATTG                                                      |                                                                         |
| Irp promoter F             | GAGCTCGGTACCCGGGGATCCTCGGTGGCGTCAATCAACTGCC                               | In-vivo assembly cloning of Irp promoter                                |
| Irp promoter R             | CGACCTGAATGGAAGCCGGCCTGCCAGACCCTGAACTACATC                                | "                                                                       |
| pPROBE F                   | GAGGATCCCCGGGTACCGAGCTC                                                   | In-vivo assembly amplification of pPROBE-NT                             |
| pPROBE R                   | GCCGGCTTCATTAGGTCG                                                        | "                                                                       |
| flhDC F                    | CATGAGCTCGAACCGAATGGTTTTGCCTA                                             | Cloning FlhDC1 into pML123                                              |
| flhDC R                    | GTCTCTAGAAAACGTGTGGGTGAGAGGAG                                             | "                                                                       |

<sup>1</sup>Miller-Williams, M., Loewen, P. C., & Oresnik, I. J. (2006). Isolation of salt-sensitive mutants of *Sinorhizobium meliloti* strain Rm1021. *Microbiology*, 152(7), 2049-2059.

<sup>2</sup>Oresnik, I. J., Pacarynuk, L. A., O'Brien, S. A., Yost, C. K., & Hynes, M. F. (1998). Plasmid-encoded catabolic genes in *Rhizobium leguminosarum* bv. *trifolii*: evidence for a plant-inducible rhamnose locus involved in competition for nodulation. *Molecular plant-microbe interactions*, 11(12), 1175-1185.

<sup>3</sup>Urban, J. H., & Vogel, J. (2007). Translational control and target recognition by *Escherichia coli* small RNAs in vivo. *Nucleic acids research*, 35(3), 1018-1037.
